# Supplementary material for: Assessment of Screening Tools to Identify Substance Use Disorders Among Adolescents
Source: PubMed Central journal article supplement (PMC10203888; doi:10.1001/jamanetworkopen.2023.14422), 2023-05-22
Supplement: jamanetwopen-e2314422-s002.pdf [file jamanetwopen-e2314422-s002.pdf]

## Data Sharing Statement

Levy. Assessment of Screening Tools to Identify Substance Use Disorders Among Adolescents. *JAMA Netw Open*. Published May 22, 2023.

doi:10.1001/jamanetworkopen.2023.14422

### Data

**Data available:** Yes

**Data types:** Deidentified participant data

**How to access data:** <https://datashare.nida.nih.gov/data>

**When available:** With publication

### Supporting Documents

**Document types:** None

### Additional Information

**Who can access the data:** Data will be publicly available.

**Types of analyses:** Any purpose

**Mechanisms of data availability:** without investigator support
